# Supplementary material for: Comprehensive profiling of novel microRNA-9 targets and a tumor suppressor role of microRNA-9 via targeting IGF2BP1 in hepatocellular carcinoma
Source: PubMed Central journal article supplement (PMC4747208; doi:10.18632/oncotarget.5969), 2015-10-19
Supplement: oncotarget-06-42040-s001.pdf [file oncotarget-06-42040-s001.pdf]

## SUPPLEMENTARY FIGURE AND TABLES

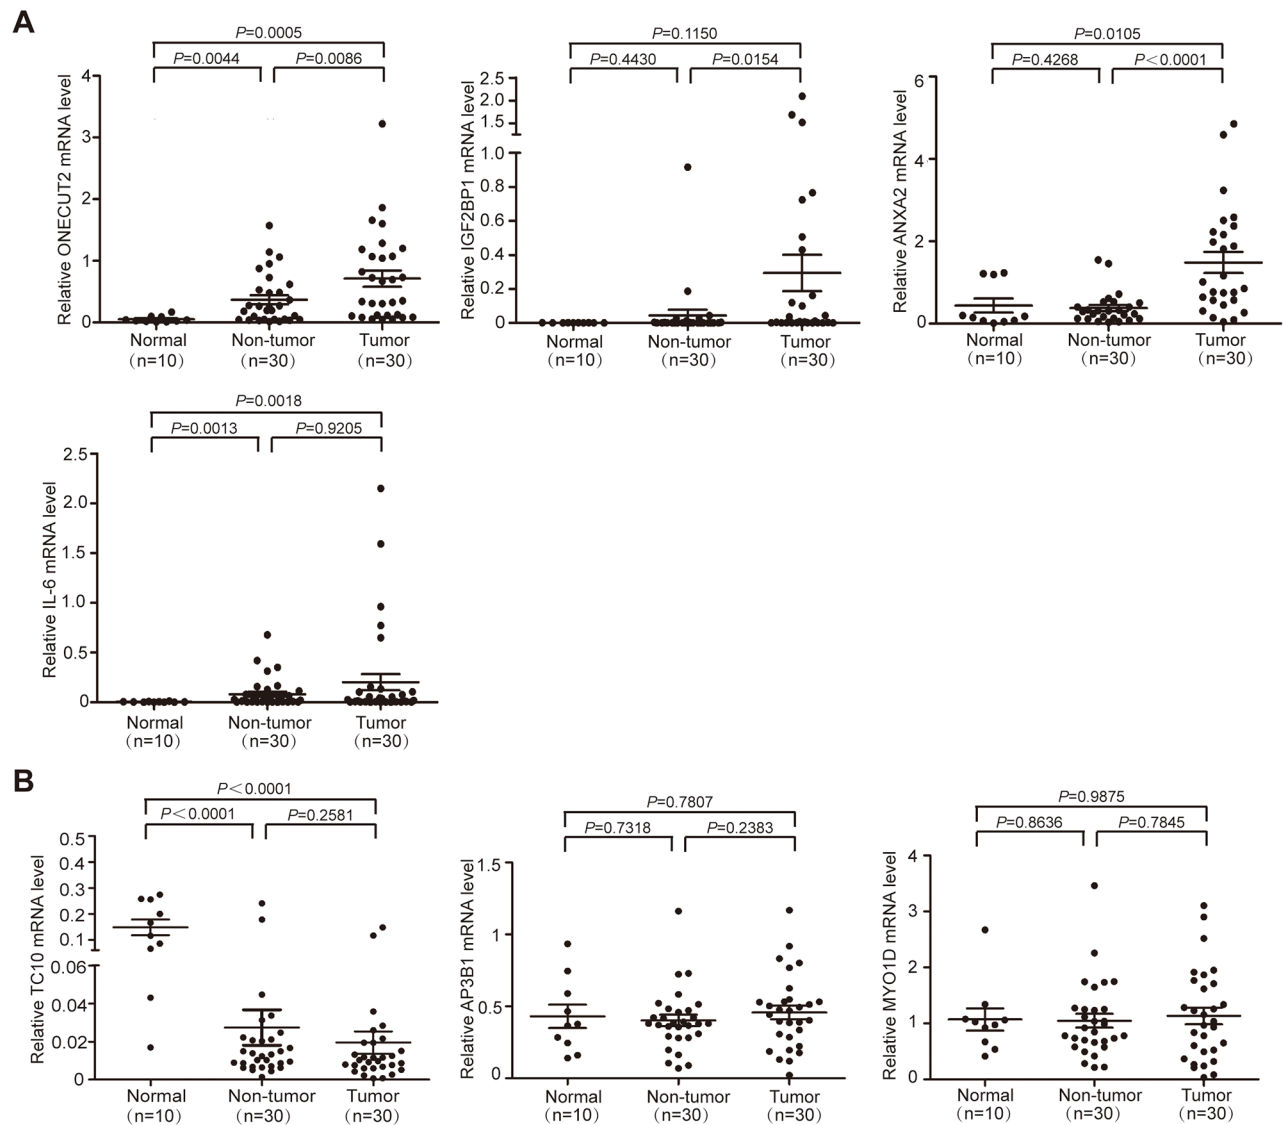

**Supplementary Figure S1:** A. Relative mRNA level of ONECUT2, IGF2BP1, ANXA2 and IL-6 genes in 30 paired HCC tumor tissues and adjacent non-tumor tissues, as well as 10 normal liver tissues. Data were represented as mean  $\pm$  SEM. B. Relative mRNA level of TC10, AP3B1 and MYO1D genes in 30 paired HCC tumor tissues and adjacent non-tumor tissues, as well as 10 normal liver tissues. Data were represented as mean  $\pm$  SEM.

**Supplementary Table S1: miR-9 target gene list predicted by bioinformatic softwares.**

**Supplementary Table S2: Gene expression profiling in 6 pairs of primary HCC tissues.**

**Supplementary Table S3: The correlation between gene expression status and patients clinicopathologic features.**

**Supplementary Table S4: Clinicopathological features of HCC patients cohort**

| Clinicopathological Features |                | Cases <i>n</i> (%) |
|------------------------------|----------------|--------------------|
|                              |                | <i>n</i> = 85*     |
| Gender                       |                |                    |
|                              | Male           | 68 (80.00)         |
|                              | Female         | 17 (20.00)         |
| Age                          |                |                    |
|                              | Median (Range) | 53 (21–76)         |
| Cirrhosis                    |                |                    |
|                              | Yes            | 76 (89.41)         |
|                              | No             | 7 (8.23)           |
|                              | N/A            | 2 (2.35)           |
| Portal Vein Invasion         |                |                    |
|                              | Present        | 26 (67.06)         |
|                              | Absent         | 57 (74.14)         |
|                              | N/A            | 2 (2.35)           |
| Tumor Size                   |                |                    |
|                              | ≥5 cm          | 60 (70.59)         |
|                              | <5 cm          | 17 (20.00)         |
|                              | N/A            | 8 (9.41)           |
| Tumor Encapsulation          |                |                    |
|                              | Complete       | 68 (80.00)         |
|                              | Uncomplete     | 9 (10.59)          |
|                              | N/A            | 8 (9.41)           |
| Intrahepatic Metastasis      |                |                    |
|                              | Absent         | 34 (40.00)         |
|                              | Present        | 49 (57.65)         |
|                              | N/A            | 2 (2.35)           |
| AFP                          |                |                    |
|                              | <400           | 40 (47.06)         |

(Continued)

| Clinicopathological Features |          | Cases n (%) |
|------------------------------|----------|-------------|
|                              | ≥400     | 42 (49.41)  |
|                              | N/A      | 3 (3.53)    |
| Virus Infection Background   |          |             |
|                              | HBV      | 72 (84.7)   |
|                              | HCV      | 2 (2.4)     |
|                              | Others   | 11 (12.9)   |
| HBsAg                        |          |             |
|                              | Positive | 72 (84.71)  |
|                              | Negative | 12 (14.12)  |
|                              | N/A      | 1 (1.17)    |
| HBeAg                        |          |             |
|                              | Positive | 2 (2.35)    |
|                              | Negative | 81 (95.30)  |
|                              | N/A      | 2 (2.35)    |
| BCLC                         |          |             |
|                              | A        | 33 (38.82)  |
|                              | B+C      | 49 (57.65)  |
|                              | N/A      | 3 (3.53)    |
| Survival                     |          |             |
|                              | 1 year   | 58 (68.33)  |
|                              | 2 year   | 47 (55.29)  |
|                              | 3 year   | 40 (46.67)  |
|                              | 4 year   | 28 (33.33)  |
|                              | 5 year   | 23 (26.67)  |
|                              | N/A      | 22 (25.88)  |

Note: All patients were from the local ethnic Chinese Han population.

\*The clinicopathological parameters of two patients are not available.

### Supplementary Table S5: Primers sequences for the methylation detection and the size of the PCR products

| Gene name | Forward (5'-3')                 | Reverse (5'-3')                 | Size (bp) |
|-----------|---------------------------------|---------------------------------|-----------|
| mir-9-1   | CCGGCACC GCGGCTCC<br>CCATTTCCAT | CTCCACTGCCCTTCTCTG<br>GAAGATCGA | 108       |
| mir-9-2   | TGTGTGCTGCGGCCGTGCTGTGA         | TGCAGCCTGAGGGCCGACGATA          | 136       |
| mir-9-3   | CCGTGAACGCCGAGGCCATT            | CGCGGAGCGCTTAGAGAGCC            | 222       |

Note: the annealing temperature of the primers are 74°C.

**Supplementary Table S6: Primer sequences for the detection of target genes expression**

| Gene name | Forward (5'-3')         | Reverse (5'-3')           | Size (bp) |
|-----------|-------------------------|---------------------------|-----------|
| IL-6      | TTCGGTACATCCTCGACGGCATC | CAGCTCTGGCTTGTTCCCTCACTAC | 258       |
| AP3B1     | GATGTTGAAGAGTGGGGGCA    | TGTGCCAATACAGCTGAGCA      | 274       |
| TC10      | ACTGACCTTGATGGGTTTGG    | TGGCCTTATTTGAGGCAGTG      | 331       |
| ONECUT2   | AGGCTGCCTACACCGCCTATC   | GCCGTCCAGGATCGAGGCCAT     | 344       |
| IGF2BP1   | GCGATGAAGGCCATCGAAAC    | AGCTTCATGATGGCTTGCTT      | 269       |
| MYO1D     | GAGCTGTATGAGAGACCGCC    | CTGCTCTCTGACTGGGGTTG      | 181       |
| ANXA2     | TCCCGCTTGGTTGAACACAT    | CATTGCTGCGGTTGGTCAA       | 240       |
| CTBP      | TTCACCGTCAAGCAGATGAGAC  | CTGGCTAAAGCTGAAGGGTCC     | 156       |

Note: the annealing temperature of the primers are 60°C.

**Supplementary Table S7: Primer sequences for luciferase reporter plasmid construction**

| Gene name              | Forward (5'-3')                | Reverse (5'-3')                  |
|------------------------|--------------------------------|----------------------------------|
| <b>IL6-3'UTR</b>       | GGGCCCAGGGGCTCTTCGGCAAAT       | CTCGAGCTGGCTCTGAAACAAAGGATA      |
| <b>AP3B1-3'UTR</b>     | GGGCCCCCTGTCCTGTCTCAGGGGTA     | CTCGAGGAGAAAACGCCACATGGATT       |
| <b>TC10-3'UTR</b>      | GGGCCCAGTACCTTGATGGGTTTGG      | CTCGAGTGGCCTTATTTGAGGCAGTG       |
| <b>ONECUT2-3'UTR</b>   | GGGCCCCGGGTTTTTCTCATCCATCC     | CTCGAGTCACATGAAAACGAGGCTGT       |
| <b>IGF2BP1-3'UTR</b>   | GGGCCCCCTCCTCCCAGTCCTTATC      | CTCGAGTCGAAAGCTGGCTATTGCTT       |
| <b>MYO1D-3'UTR</b>     | GGGCCCCGCCCTGTAAGATTTCCCTT     | CTCGAGTGTCCAGGTGCTCTGACTTG       |
| <b>ANXA2-3'UTR</b>     | GGGCCCCTGTGAGGGTGACGTTAGCA     | CTCGAGGAAAGCAGGGCCACAAAGTA       |
| <b>MTHFD1L-3'UTR</b>   | GGGCCCCGATGCAGACTCCTGAAACA     | CTCGAGGCCGAACACCATACTCCACT       |
| <b>HSPC159-3'UTR</b>   | GGGCCCAGGCACTGAAGTGACCATGT     | CTCGAGCACGGAACAGGCTGAATATG       |
| <b>KIF23-3'UTR</b>     | GGGCCCCACGGACCTCAGCTACATCA     | CTCGAGTCATCTAAGACAAACACTTGTGTGAA |
| <b>GLS-3'UTR</b>       | GGGCCCCGCATGGAGACAGGTAGCAT     | CTCGAGGAGCGCTCAGGATACAGAAAA      |
| <b>HLTF-3'UTR</b>      | GGGCCCTCAGACCTTTTATACTTTTGACCA | CTCGAGGGAAAAATAAAAACCTGTGCTAACC  |
| <b>SGOL1-3'UTR</b>     | CAGGGTTTCTCCATGTTGGT           | GGGAAAAATAGAGATGCCAGAA           |
| <b>LMNA-3'UTR</b>      | GGGCCCTTCTCCTCCCTTCTTTTCC      | CTCGAGGGCTCAAGCTGTCCTCTCTC       |
| <b>EHF-3'UTR</b>       | GGGCCCTTATTCTGCCTGGCTTGG       | CTCGAGACAGTCAAATGCTGGGAAGG       |
| <b>PIK3R3-3'UTR</b>    | GGGCCCCCACGAAGAAGGCTGTTTA      | CTCGAGAAACAGGCAGGAAGGACAGA       |
| <b>FAM13C-3'UTR</b>    | GGGCCCCGACACTTGTTAGGGAA        | CTCGAGGTAAACCAAAGATTAGC          |
| <b>IGF2BP3-3'UTR</b>   | GGGCCCCAGGTAAAGCAGCACCAACA     | CTCGAGAGTTGCCTGGTCTCAGAAA        |
| <b>RAB11FIP4-3'UTR</b> | GGGCCCCGCTACCTACCTCCCCGTTTC    | CTCGAGCTGCGTGGAGAATGAAGACA       |

Note: the annealing temperature of the primers are 57–65°C.
